# Supplementary material for: Childhood adversity correlates with stable changes in DNA methylation trajectories in children and converges with epigenetic signatures of prenatal stress
Source: PubMed Central journal article supplement — Neurobiol Stress. 2021 May 13;15:100336. doi: 10.1016/j.ynstr.2021.100336 (PMC8163992; doi:10.1016/j.ynstr.2021.100336), 2021-05-13
Supplement: mmc1.pdf [file mmc1.pdf]

## Supplementary Material

**Table S1: Demographics.** Demographic data, developmental and behavioral diagnostics, stratified by time point and case-control status. Mean and standard deviation is given for the quantitative measures.

|                                                         | T0                       | T1                       | T2                       | T3                         | T4                         |
|---------------------------------------------------------|--------------------------|--------------------------|--------------------------|----------------------------|----------------------------|
| sample size                                             | 173                      | 146                      | 130                      | 111                        | 90                         |
| sex maltreated <sup>1</sup>                             | m=45, f=41               | m=36, f=30               | m=30, f=30               | m=25, f=22                 | m=21, f=17                 |
| sex non-maltreated                                      | m=46, f=41               | m=42, f=38               | m=36, f=34               | m=34, f=30                 | m=27, f=25                 |
| age maltreated <sup>1</sup>                             | 4.36±0.83                | 4.84±0.85                | 5.33± 0.81               | 5.85±0.83                  | 6.39±0.82                  |
| age non-maltreated                                      | 4.11±0.73                | 4.60±0.73                | 5.03±0.74                | 5.54±0.72                  | 4.04±0.71                  |
| number of maltreated <sup>1</sup><br>and non-maltreated | 86 (49.7%)<br>87 (50.3%) | 66 (45.2%)<br>80 (54.8%) | 60 (46.2%)<br>70 (43.8%) | 47 (42.3 %)<br>64 (57.7 %) | 38 (42.2 %)<br>52 (57.8 %) |
| SES <sup>2</sup> maltreated <sup>1</sup>                | 9.38±4.46                | 9.88±4.70                | 9.75±4.85                | 9.76±4.63                  | 10.18±4.45                 |
| SES non-maltreated                                      | 16.10±3.60               | 16.01±3.50               | 16.41±3.55               | 16.40±3.72                 | 15.94±3.83                 |
| SON_IQ <sup>3</sup> maltreated <sup>1</sup>             | 90.09±17.33              | -                        | 93.45±17.40              | -                          | 95.5±16.74                 |
| SON_IQ non-maltreated                                   | 106.32±12.22             | -                        | 109.14±13.00             | -                          | 113.73±13.30               |
| WPPSI <sup>4</sup> maltreated <sup>1</sup>              | 90.42±13.33              | -                        | 92.46±14.24              | -                          | 93.37±15.29                |
| WPPSI non-maltreated                                    | 105.09±11.96             | -                        | 106.19±9.36              | -                          | 107.69±8.24                |
| CBCL <sup>5</sup> maltreated <sup>1</sup>               | 54.82±11.39              | 53.31±10.8               | 50.53±11.24              | 51.66±11.18                | 50.70±12.48                |
| CBCL non-maltreated                                     | 41.37±8.97               | 2<br>41.51±9.59          | 39.1±7.55                | 41.30±7.76                 | 40.37±8.17                 |
| PAPA <sup>6</sup> maltreated <sup>1</sup>               | 49 (28.3%)               | -                        | 36 (20.5%)               | -                          | 17 (18.9%)                 |
| PAPA <sup>2</sup> non-maltreated                        | 18 (10.4%)               | -                        | 12 (8.2%)                | -                          | 10 (11.1%)                 |

<sup>1</sup> any subject which experienced a maltreatment event of sufficient severity was included in the maltreated group

<sup>2</sup> socio-economic status

<sup>3</sup> SON\_IQ is a non-verbal intelligence test, which was used as developmental measure

<sup>4</sup> WPPSI Wechsler preschool and primary scale of intelligence, developmental measure with spoken component

<sup>5</sup> Child behavioral check list, a caregiver report form for problematic behavior

<sup>6</sup> Preschool age psychiatric assessment (PAPA), at least one symptom in the PAPA questionnaire

**Table S2: Differentially methylated regions aggregated from linear mixed models** (Model 1-3) using all time points (T0-T5). Only regions with more than 5 CpGs and passing multiple testing correction are reported with nominal p-value. No significant (n.s.) hits were found for models 2 (additive model) and 3 (interaction model).

| Models                               | DMRs                                                                                                                                                                                                                                           | # CpGs                                       | p-value                                                                                                                                                                                                                        | genes                                                                                                                                                | annotation                                                                                                                                                                                                                            |
|--------------------------------------|------------------------------------------------------------------------------------------------------------------------------------------------------------------------------------------------------------------------------------------------|----------------------------------------------|--------------------------------------------------------------------------------------------------------------------------------------------------------------------------------------------------------------------------------|------------------------------------------------------------------------------------------------------------------------------------------------------|---------------------------------------------------------------------------------------------------------------------------------------------------------------------------------------------------------------------------------------|
| <b>Time (Model 1)</b>                | chr5:126409006-126409311<br>chr5:178986130-178986831<br>chr6:30095135-30095496<br>chr7:24323674-24323940<br>chr7:63386225-63387148<br>chr7:130125763-130125985<br>chr8:22132562-22133357<br>chr14:24780550-24780891<br>chr21:45705617-45705743 | 8<br>13<br>17<br>7<br>7<br>7<br>13<br>9<br>7 | $2.97 \times 10^{-4}$<br>$4.23 \times 10^{-6}$<br>$9.83 \times 10^{-9}$<br>$1.24 \times 10^{-3}$<br>$1.43 \times 10^{-10}$<br>$3.21 \times 10^{-2}$<br>$1.23 \times 10^{-8}$<br>$1.18 \times 10^{-2}$<br>$1.70 \times 10^{-2}$ | C5orf63 exon 1<br>RUFY1 intron 1<br>Multiple HLA-REs*<br>NPY exon 1<br>RP11-73B2.6<br>MESTIT1 exon 1<br>PIWIL2 exon 1<br>CIDEB exon 1<br>AIRE exon 1 | Prenatal phthalate exposure<br>Prenatal lead exposure<br>Immune related<br>Maternal stress, neuroendocrine function<br>Angiogenesis<br>Maternal stress<br>Prenatal lead exposure<br>Cell death & inflammation<br>Autoimmune regulator |
| <b>Time + Adversity (Model 2)</b>    | n.s.                                                                                                                                                                                                                                           | -                                            | n.s.                                                                                                                                                                                                                           |                                                                                                                                                      |                                                                                                                                                                                                                                       |
| <b>Time + Maltreatment (Model 2)</b> | n.s.                                                                                                                                                                                                                                           | -                                            | n.s.                                                                                                                                                                                                                           |                                                                                                                                                      |                                                                                                                                                                                                                                       |
| <b>Time x Adversity (Model 3)</b>    | n.s.                                                                                                                                                                                                                                           | -                                            | n.s.                                                                                                                                                                                                                           |                                                                                                                                                      |                                                                                                                                                                                                                                       |
| <b>Time x Maltreatment (Model 3)</b> | n.s.                                                                                                                                                                                                                                           | -                                            | n.s.                                                                                                                                                                                                                           |                                                                                                                                                      |                                                                                                                                                                                                                                       |

\* regulatory element

**Table S3: Differentially methylated regions aggregated from linear mixed models (Model 1-3) using the first three time points (T0-T2).** Only regions with more than 5 CpGs and passing multiple testing correction are reported with nominal p-value. No significant (n.s.) hits were found for the model Time x Maltreatment.

| Models                               | DMRs                                                                                                                                                                                         | # CpGs                              | adjusted p-value                                                                                                                                                     | gene                                                                                                               | annotation                                                                                                                                                                                     |
|--------------------------------------|----------------------------------------------------------------------------------------------------------------------------------------------------------------------------------------------|-------------------------------------|----------------------------------------------------------------------------------------------------------------------------------------------------------------------|--------------------------------------------------------------------------------------------------------------------|------------------------------------------------------------------------------------------------------------------------------------------------------------------------------------------------|
| <b>Time (Model 1)</b>                | chr1:110254678-110254920<br>chr3:182817189-182817627<br>chr8:144635259-144635611<br>chr11:2721242-2721633<br>chr14:106938233-106938452<br>chr19:57742259-57742445<br>chr20:36148603-36148780 | 8<br>12<br>10<br>12<br>6<br>7<br>11 | $3.18 \cdot 10^{-3}$<br>$6.40 \cdot 10^{-9}$<br>$8.15 \cdot 10^{-6}$<br>$2.71 \cdot 10^{-8}$<br>$8.09 \cdot 10^{-3}$<br>$1.51 \cdot 10^{-3}$<br>$1.59 \cdot 10^{-3}$ | GSTM3/5 enhancer<br>MCCC1 exon 1<br>GSDMS exon 1<br>KCNQ1 intron 11<br>LINC22001<br>AURKC exon 1<br>BLCAP intron 1 | maternal smoking, FAS <sup>1</sup><br>brain volume in schizophrenia<br>pyroptotic cell-death<br>neuronal excitability, prenatal arsen exposure<br>-<br>Prenatal lead & tobacco exposure<br>FAS |
| <b>Time + Adversity (Model 2)</b>    | chr6:31275147-31275808<br>chr10:42862977-42863595                                                                                                                                            | 10<br>8                             | $7.02 \cdot 10^{-7}$<br>$9.83 \cdot 10^{-9}$                                                                                                                         | HLA-B intron 2<br>ZFP91 pseudogene                                                                                 | Immune related gene<br>Cell proliferation / migration                                                                                                                                          |
| <b>Time + Maltreatment (Model 2)</b> | chr6:31275147-31275808<br>chr10:42862977-42863595                                                                                                                                            | 10<br>8                             | $1.35 \cdot 10^{-5}$<br>$2.25 \cdot 10^{-9}$                                                                                                                         | HLA-B intron 2<br>ZFP91 pseudogene                                                                                 | Immune related gene<br>Cell proliferation / migration                                                                                                                                          |
| <b>Time x Adversity (Model 3)</b>    | chr2:26401597-26402319<br>chr3:189839037-189839358<br>chr19:9785646-9786078<br>chr22:24384104-24384401                                                                                       | 10<br>7<br>8<br>8                   | $1.88 \cdot 10^{-8}$<br>$3.13 \cdot 10^{-4}$<br>$9.32 \cdot 10^{-4}$<br>$1.28 \cdot 10^{-4}$                                                                         | GAREML intron 1<br>P3H2 intron 1<br>ZNF562 exon 1<br>GSTT1 exon 1                                                  | FAS, childhood abuse<br>Childhood abuse<br>Early onset MDD <sup>2</sup><br>FAS                                                                                                                 |
| <b>Time x Maltreatment (Model 3)</b> | -                                                                                                                                                                                            | -                                   | n.s.                                                                                                                                                                 |                                                                                                                    |                                                                                                                                                                                                |

<sup>1</sup>Fetal alcohol syndrome

<sup>2</sup>Major depressive disorder

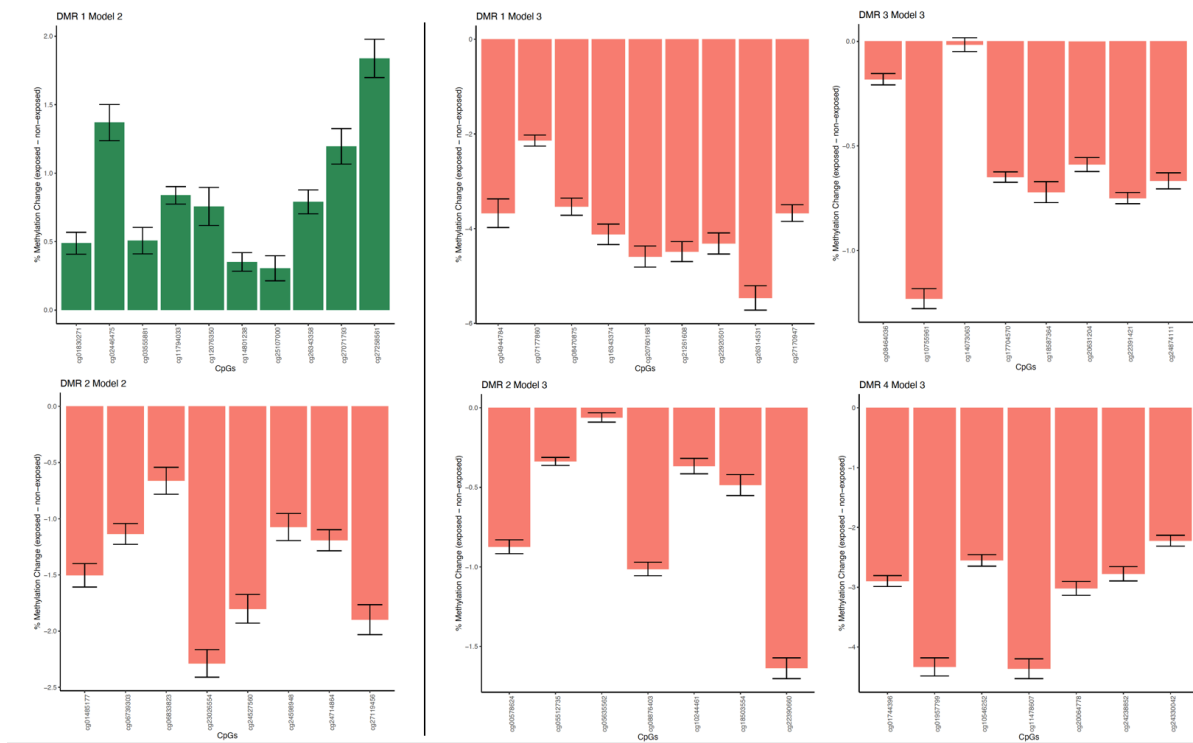

**Figure S4: Significantly differentially methylated region by adversity from models 2 and 3 for T0-T2.** DMRs obtained from model 2 are shown in the left panel, DMRs from model 3 in the right. Most of the regions are hypomethylated in subjects with high adversity score.

**Table S5: Overview of WGCNA modules**

Detailed information on associations with exposure variables are given in Figure 5, information on GWAS overlap and enrichment for pathways (KEGG, GO and Reactome) can be found in supplementary table S6 and S7.

| Module    | #CpGs / genes   | Associations      | Enrichment                          |
|-----------|-----------------|-------------------|-------------------------------------|
| Brown     | 659 / 637       | -                 | -                                   |
| Pink      | 64 / 49         | -                 | -                                   |
| Blue      | 22,531 / 8.371  | prenatal scores   | cell signaling /<br>immune related  |
| Black     | 91 / 81         | -                 | diabetes type I                     |
| Yellow    | 317 / 143       | sex               | -                                   |
| Turquoise | 56.344 / 14.736 | prenatal scores   | -                                   |
| Green     | 268 / 164       | maltreatment, sex | -                                   |
| Red       | 107 / 87        | -                 | -                                   |
| Grey      | 2.575 / 1.778   | prenatal scores   | drug metabolism /<br>immune related |

**Table S6: Module annotation.** CpGs within a module were mapped to genes based on the annotation of the EPIC array and then used with FUMA. Shown here are the top five overlapping GWAS hits per module, where enrichment passed multiple testing correction.

| Module* | GWAS                            | #genes (overlap) | Adjusted p-value       |
|---------|---------------------------------|------------------|------------------------|
| Black   | -                               | -                | n.s.                   |
| Blue    | Heel bone mineral density       | 389/767          | $1.56 \times 10^{-46}$ |
|         | Systolic blood pressure         | 349/746          | $2.78 \times 10^{-32}$ |
|         | Body-Mass-Index                 | 492/1209         | $1.92 \times 10^{-27}$ |
|         | Monocyte percentage white cells | 100/147          | $5.57 \times 10^{-25}$ |
|         | Mean platelet volume            | 132/233          | $5.18 \times 10^{-21}$ |
| Brown   | Type II diabetes                | 248/458          | $6.94 \times 10^{-5}$  |
|         | Systolic blood pressure         | 36/746           | $2.44 \times 10^{-4}$  |
|         | Modic change                    | 4/7              | $1.92 \times 10^{-3}$  |
|         | Atrial fibrillation             | 16/221           | $1.92 \times 10^{-3}$  |
|         | Asthma                          | 18/311           | $6.15 \times 10^{-3}$  |
| Green   | -                               | -                | n.s.                   |
| Grey    | Pneumonia                       | 8/8              | $3.01 \times 10^{-8}$  |
|         | Drug induced liver injury       | 9/13             | $5.48 \times 10^{-7}$  |
|         | IgE levels                      | 10/18            | $9.39 \times 10^{-7}$  |
|         | Asthma                          | 43/311           | $9.39 \times 10^{-7}$  |
|         | Neuromyelitis optica            | 7/9              | $4.43 \times 10^{-6}$  |
| Pink    | -                               | -                | n.s.                   |
| Red     | -                               | -                | n.s.                   |
| Yellow  | -                               | -                | n.s.                   |

\* the turquoise module was not annotated as it contained over 50% of the CpGs from the analysis

**Table S7: Module annotation.** Reported here are the top five pathways per module from the functional annotation analysis

| Module* | Pathway                         | #genes (overlap) | Adjusted p-value       |
|---------|---------------------------------|------------------|------------------------|
| Black   | -                               | -                | n.s.                   |
| Blue    | Chemokine signaling             | 91/177           | $4.31 \times 10^{-11}$ |
|         | Focal adhesion                  | 96/195           | $1.82 \times 10^{-10}$ |
|         | Regulation of actin skeleton    | 98/205           | $7.40 \times 10^{-10}$ |
|         | Leukocyte migration             | 60/111           | $1.17 \times 10^{-8}$  |
|         | B-cell receptor signaling       | 42/72            | $1.61 \times 10^{-7}$  |
| Brown   | Diabetes Mellitus Type I        | 6/40             | $1.93 \times 10^{-2}$  |
|         | Allograft rejection             | 5/34             | $2.71 \times 10^{-2}$  |
| Green   | -                               | -                | n.s.                   |
| Grey    | Diabetes Mellitus Type I        | 11/40            | $3.40 \times 10^{-4}$  |
|         | Allograft rejection             | 10/34            | $3.40 \times 10^{-4}$  |
|         | Autoimmune Thyroid disease      | 11/49            | $1.18 \times 10^{-3}$  |
|         | Drug metabolism cytochrome p450 | 12/59            | $1.25 \times 10^{-3}$  |
|         | Antigen processing              | 13/75            | $2.97 \times 10^{-3}$  |
| Pink    | -                               | -                | n.s.                   |
| Red     | -                               | -                | n.s.                   |
| Yellow  | -                               | -                | n.s.                   |

\* the turquoise module was not annotated as it contained over 50% of the CpGs from the analysis

**Supplementary data S8: List of unique genes in the green module.** The 265 CpGs grouped into the green module mapped to 164 genes. Information on the CpGs and the mapping to genes are listed in the file Supplementary\_Data\_Table\_S8.xlsx.

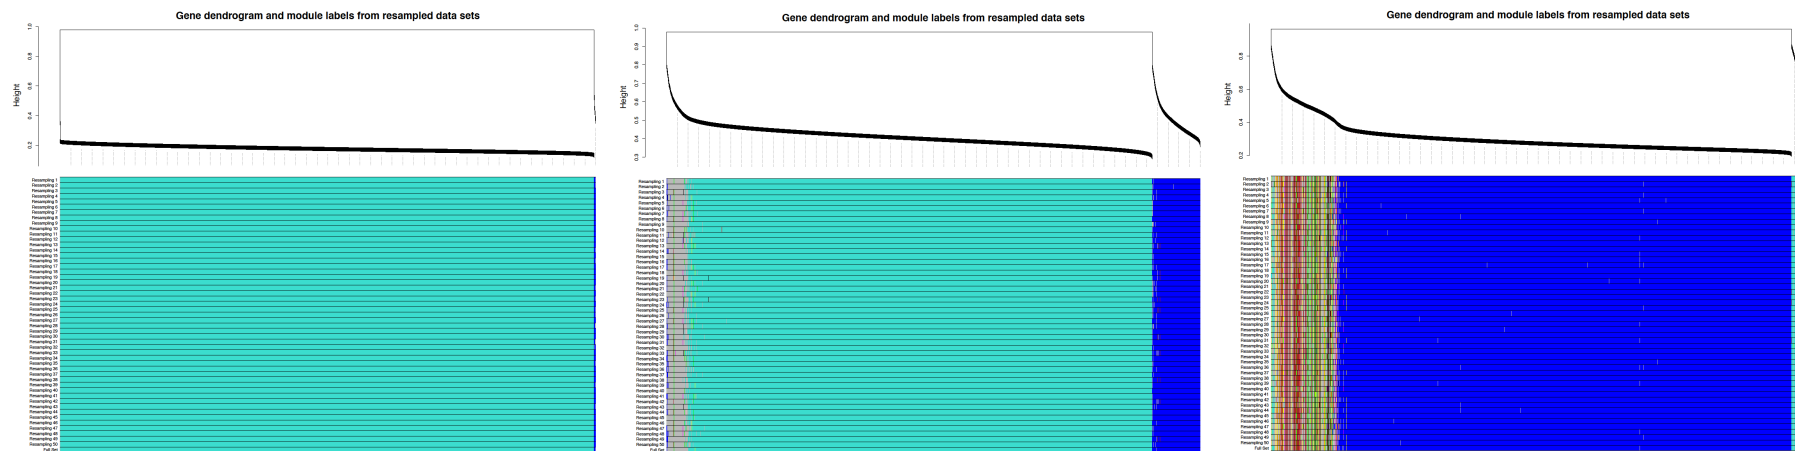

**Figure S9: Module stability analysis.** Block-wise module construction with maximum module size of 10,000 (due to computational complexity) was repeated ( $n=50$ ) with 66% of the samples. The full data set was computed using 3 blocks at `maxBlockSize` of 30,000. Shown here are the dendrograms (blocks1-3) of the full data set with the matched assignments of the resampled networks.

**Comment S10: Comparison of beta value and M-values as input.**

We were concerned that the distribution of beta-values impacted the module detected of WGCNA. We found significant differences between the methylation levels of the different modules ( $p < 2.2 \times 10^{-16}$ ), and differences for the MAD-score ( $p=1.95 \times 10^{-15}$ ) (Figure S15). Therefore, we re-ran WGCNA with z-standardized beta-values. Here, we found no significant differences between the modules (lowest  $p=0.24$ ). However, the scale-free topology of the M-values was not as good as when using beta-values (Figure S16) and never reached a good fit ( $r^2$  of 0.8 or above). Therefore, we decided to continue the analyses with the modules identified from the beta-values. The comparison was performed with power 6 for both data sets, as this is the recommended power for signed networks.



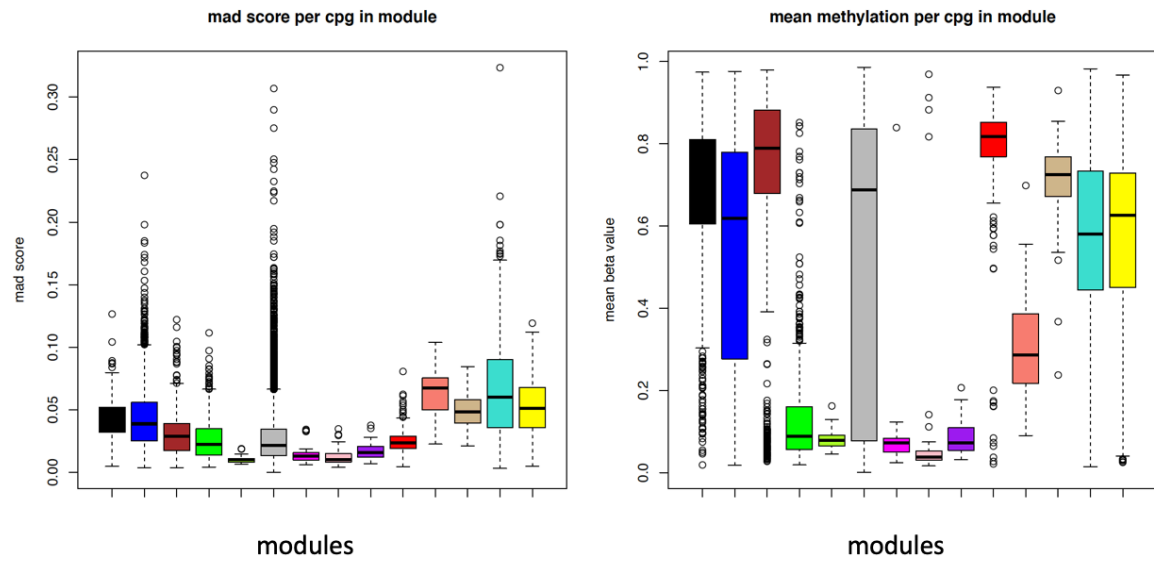

**Figure S11: Mean methylation and MAD score by module.** In order to investigate if the distribution of beta-values impacted the module detection we checked if there were significant differences in MAD scores (left) and methylation levels (right) between the modules detected.

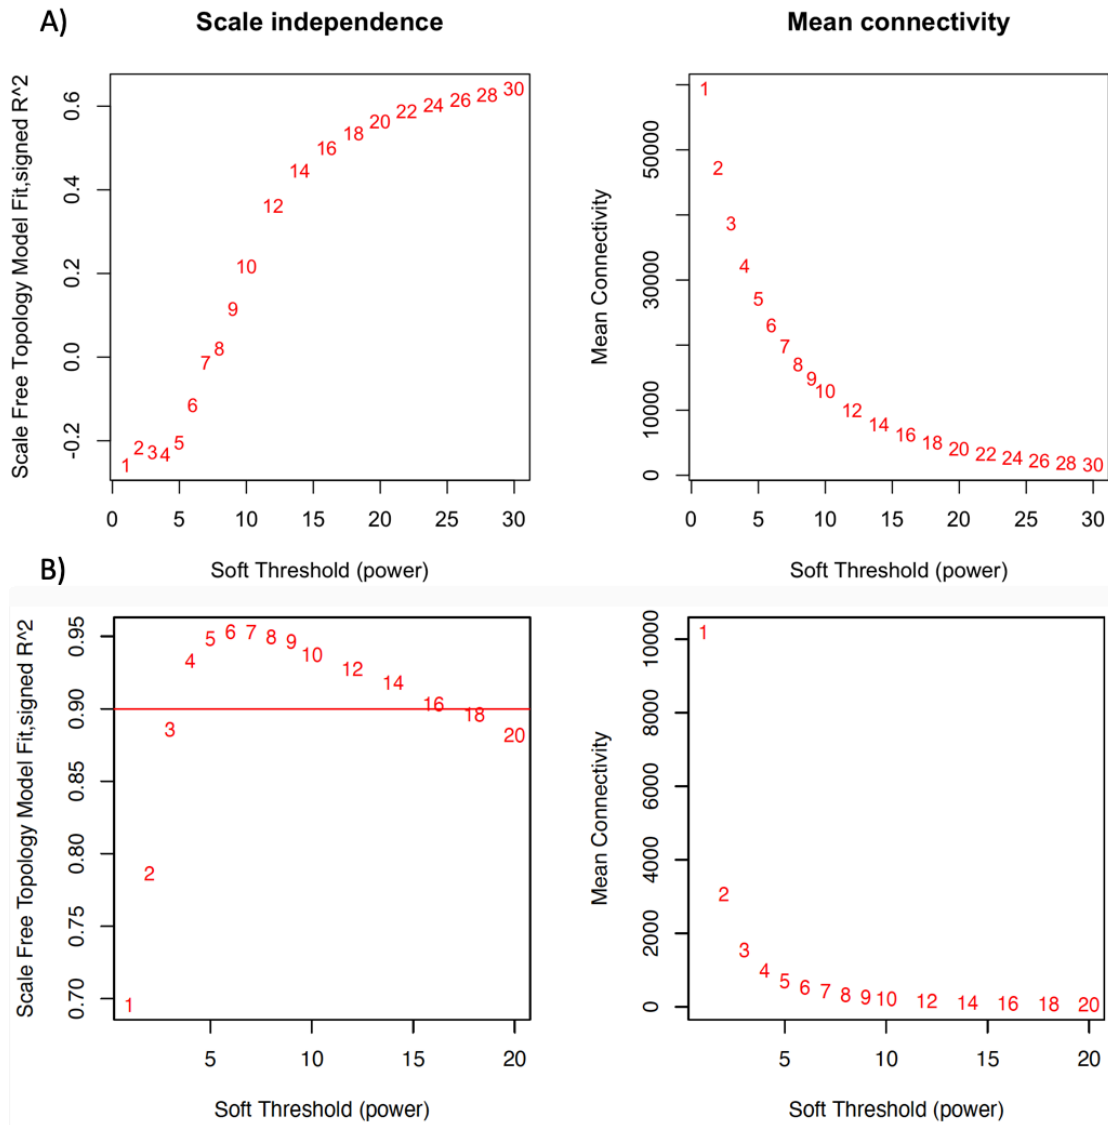

**Figure S12: scale-free topology fit.** Comparison of scale-free topology fit (left) and mean connectivity (right) for standardized M-values (A) and beta values (B). The first power to reach a  $r^2$  of 0.8 with a mean connectivity in the hundreds are considered good.
